# Supplementary material
Source: ML conference proceedings conference paper supplement (https://openaccess.thecvf.com/content/WACV2024/html/Xiao_TSA2_Temporal_Segment_WACV_2024_paper.html)
Supplement: Supplementary file 2 [file Xiao_TSA2_Temporal_Segment_WACV_2024_supplemental.zip]

Archive with 2 entries (2 files):
- 0798-supp.mp4
- 0798-supp.pdf
